# Supplementary material
Source: Springer Nature journal article supplement (https://www.springermedizin.de/resource/supplementary/12985_2009_813_MOESM4_ESM.pdf/9609246)

**Anti-GFP****DAPI****Merge****Anti-GFP****DAPI****Merge**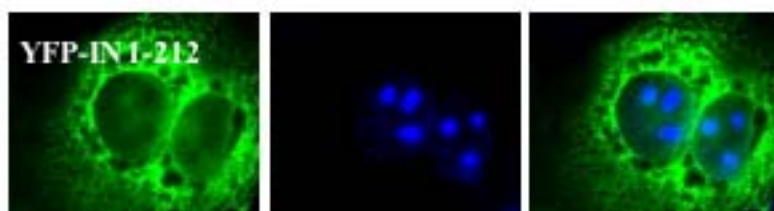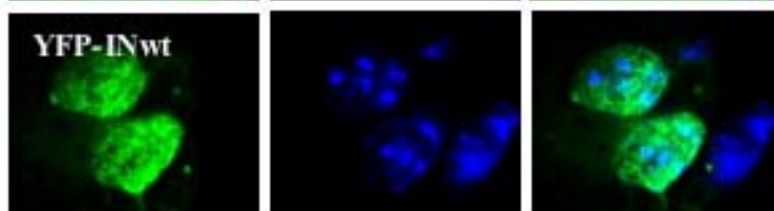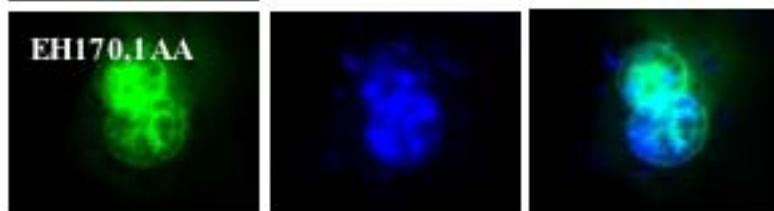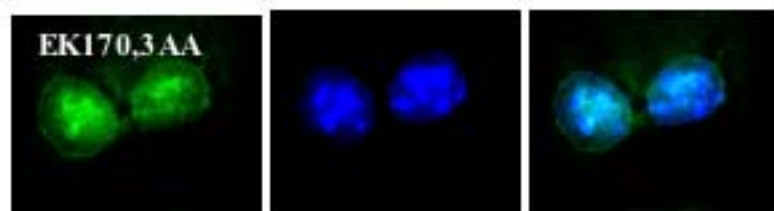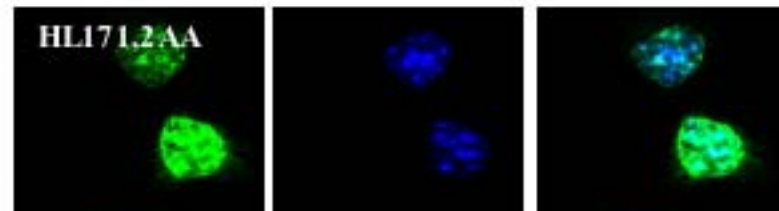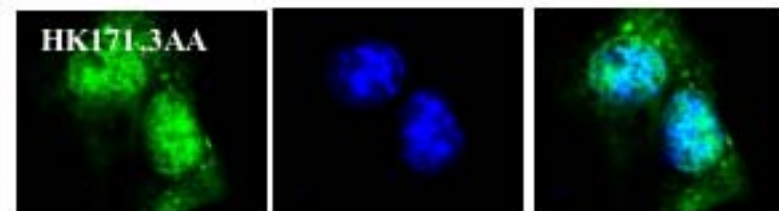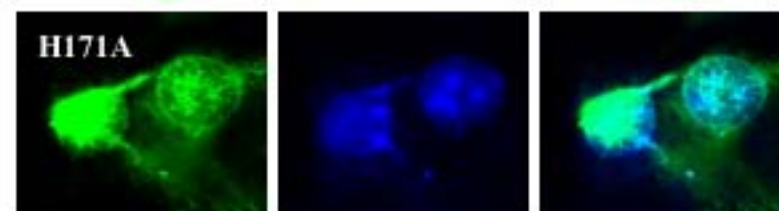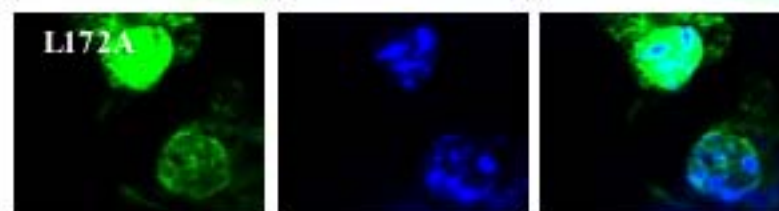

Supplement: MOESM4 [file 9609246]
